# Supplementary material for: Soil aggregation, erodibility, and erosion rates in mountain soils (NW Alps, Italy)
Source: Copernicus journal article supplement (doi:10.5194/se-6-403-2015), 2015-04-20

Supplement of Solid Earth, 6, 403–414, 2015  
<http://www.solid-earth.net/6/403/2015/>  
doi:10.5194/se-6-403-2015-supplement  
© Author(s) 2015. CC Attribution 3.0 License.

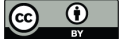

*Supplement of*

## **Soil aggregation, erodibility, and erosion rates in mountain soils (NW Alps, Italy)**

**S. Stanchi et al.**

*Correspondence to:* S. Stanchi ([silvia.stanchi@unito.it](mailto:silvia.stanchi@unito.it))

**Supplement S1:** correlations between total extractable carbon content (TEC) and aggregation stability parameters. a) abrasion loss; b) total loss of aggregates; c) time to maximum breakdown.

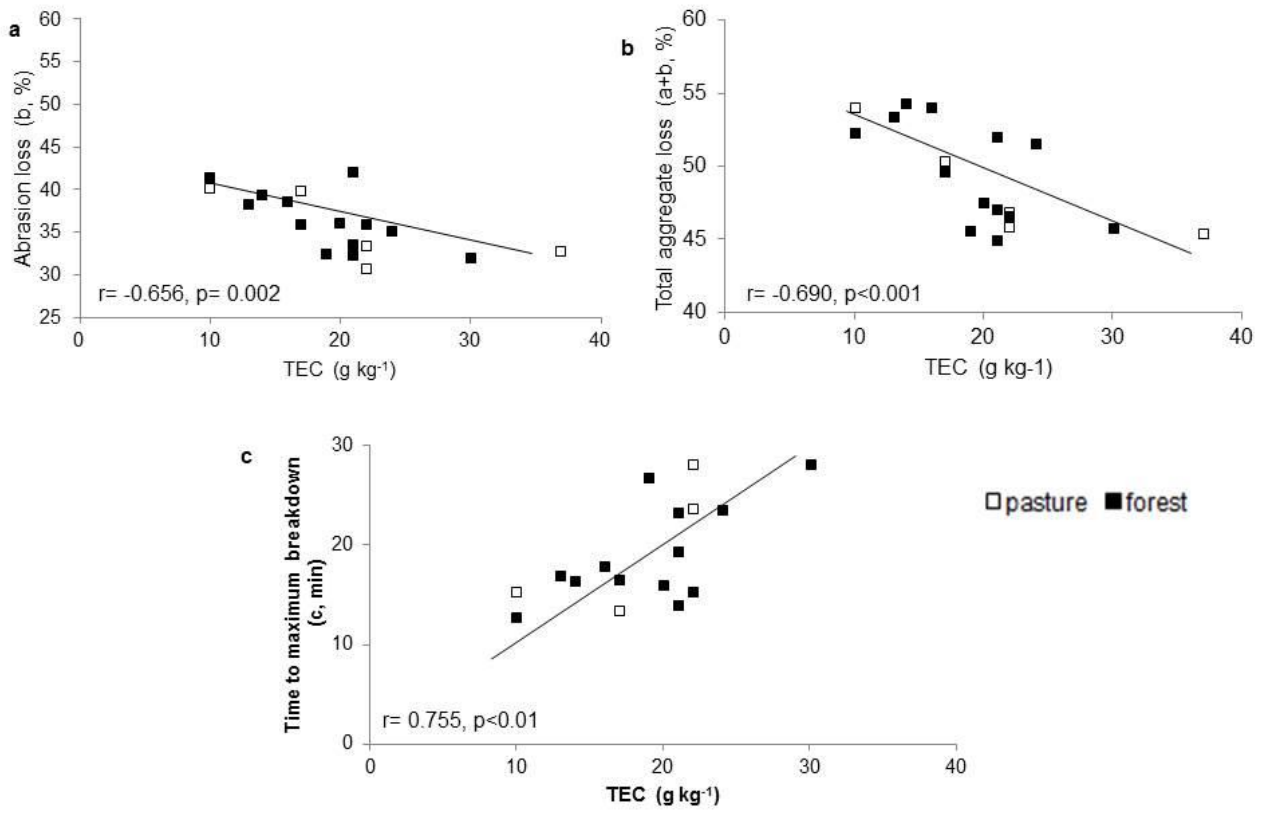

**Supplement S2:** correlations between residuals and sand classes.

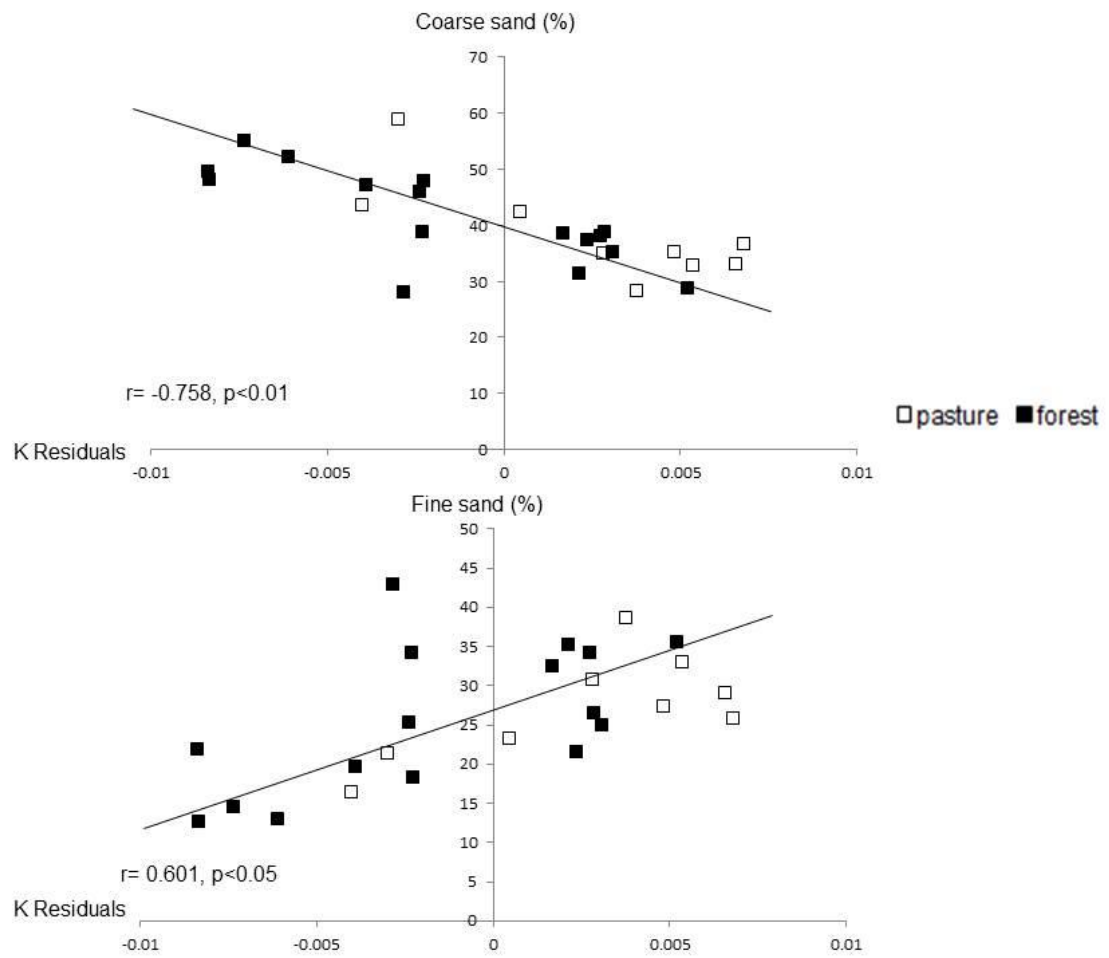

**Supplement S3:** correlation between estimated erosion and LS.

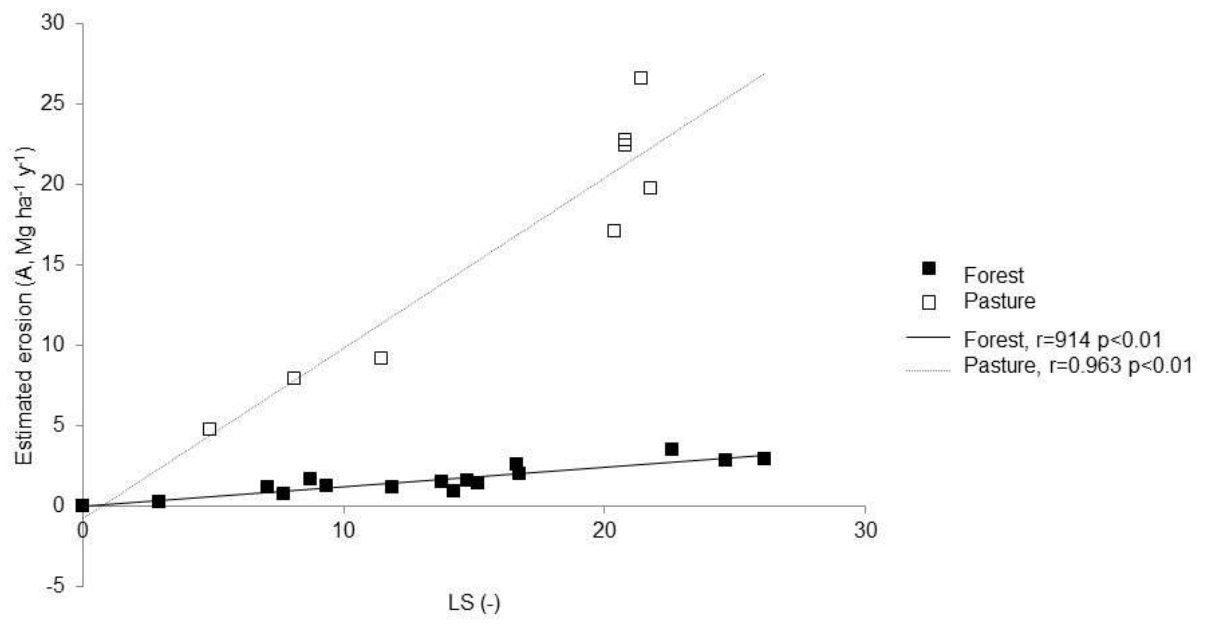

Supplement: Supplementary file [file se-6-403-2015-supplement.pdf]
